# Supplementary material for: Monodisperse Li1.2Mn0.6Ni0.2O2 microspheres with enhanced lithium storage capability
Source: Royal Society of Chemistry journal article supplement (doi:10.1039/c3ta00153a), 2013-01-01
Supplement: c3ta00153a.pdf [file c3ta00153a.pdf]

## Supplementary Information

### Monodisperse $\text{Li}_{1.2}\text{Mn}_{0.6}\text{Ni}_{0.2}\text{O}_2$ microspheres with enhanced lithium storage capability

Fuquan Cheng<sup>a</sup>, Yuelong Xin<sup>a</sup>, Jitao Chen<sup>a</sup>, Li Lu<sup>b\*</sup>, Xinxiang Zhang<sup>a</sup>, Henghui Zhou<sup>a\*</sup>

<sup>a</sup>College of Chemistry and Molecular Engineering, Peking University, Beijing 100871, PR China

<sup>b</sup>Department of Mechanical Engineering, National University of Singapore, Singapore 117576, Singapore

Email: hhzhou@pku.edu.cn, luli@nus.edu.sg

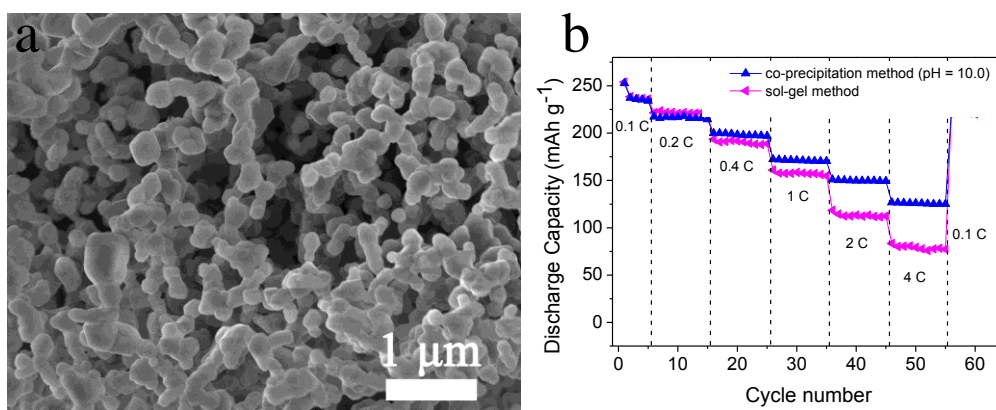

**Figure S1.** (a) typical SEM image of  $\text{Li}_{1.2}\text{Mn}_{0.6}\text{Ni}_{0.2}\text{O}_2$  nanoparticles prepared by a sol-gel method, (b) rate capabilities of the  $\text{Li}_{1.2}\text{Mn}_{0.6}\text{Ni}_{0.2}\text{O}_2$  cathode oxides prepared by different synthetic methods.
